# Supplementary material for: Neuroscience Knowledge and Endorsement of Neuromyths among Educators: What Is the Scenario in Brazil?
Source: MDPI journal article supplement (doi:10.3390/brainsci12060734), 2022-06-02
Supplement: s1 [file s1]

## Supplementary Material

**Table S1. Distribution of the survey**

| By email                                                                |                   |                          |
|-------------------------------------------------------------------------|-------------------|--------------------------|
| Event                                                                   | Region (state)    | Number of people reached |
| South region Symposium (Lecture)                                        | SOUTH (RS)        | 68                       |
| Educators meeting in Manaus (Lecture)                                   | NORTH (AM)        | 90                       |
| Educators meeting in Fortaleza (Lecture)                                | NORTHEAST (CE)    | 44                       |
| Pedagogical meeting in Recife (Lecture)                                 | NORTHEAST (PE)    | 785                      |
| Pedagogical meeting in Rio de Janeiro (Lecture)                         | SOUTHEAST (RJ)    | 734                      |
| Pedagogical meeting in Londrina (Lecture)                               | SOUTH (PR)        | 240                      |
| Pedagogical meeting in São Paulo (Lecture)                              | SOUTHEAST (SP)    | 851                      |
| Educators meeting in Palmas (Lecture)                                   | NORTH (TO)        | 101                      |
| 25 <sup>a</sup> Municipal day for teaching and learning (Lecture)       | SOUTH (RS)        | 102                      |
| Meeting of private school teachers                                      | SOUTHEAST (SP)    | 48                       |
| Education meeting in Fortaleza (Lecture)                                | NORTHEAST (CE)    | 42                       |
| Education meeting in Recife (Lecture)                                   | NORTHEAST (PE)    | 46                       |
| Education meeting in Porto Alegre (Lecture)                             | SOUTH (RS)        | 45                       |
| Education meeting in São Paulo (Lecture)                                | SOUTHEAST (SP)    | 118                      |
| Via social media (FACEBOOK)                                             |                   |                          |
| Groups                                                                  | Region (state)    | Number of people reached |
| Roraima professors' group                                               | SOUTHEAST (SP)    | 3,000 followers          |
| Pernambuco professors' group                                            | NORTHEAST (PE)    | 28,800 followers         |
| Tocantins professors' group                                             | NORTH (TO)        | 698 followers            |
| Alagoas state professors' group                                         | NORTHEAST (AL)    | 4,000 followers          |
| Elementary school professors' group                                     | BRAZIL            | 288,700 followers        |
| Professors syndicate group                                              | NORTH & NORTHEAST | 8,055 followers          |
| Union of educational establishments in the state of São Paulo (Sieeesp) | SOUTHEAST (SP)    | 3,585 followers          |
| By Journals                                                             |                   |                          |

|                                         |        |  |
|-----------------------------------------|--------|--|
| Brazilian Association of Psychopedagogy | BRAZIL |  |
| Federal Council of Education            | BRAZIL |  |

**Table S2 . Score by Region.** N: number of participants in each group; Mean: mean scores for each group; SEM: standard error of the mean.

| Region    | N    | Mean  | SEM  |
|-----------|------|-------|------|
| South     | 219  | 86.62 | 0.43 |
| Southeast | 1155 | 87.36 | 0.19 |
| Midwest   | 69   | 84.78 | 1.14 |
| North     | 34   | 85.50 | 0.96 |
| Northeast | 157  | 85.55 | 0.55 |

**Table S3 . Score by type of institution.** N: number of participants in each group; Mean: mean scores for each group; SEM: standard error of the mean.

| Type of institution               | N   | Mean  | SEM  |
|-----------------------------------|-----|-------|------|
| Municipal public school           | 520 | 86.42 | 0.30 |
| State public school               | 176 | 86.46 | 0.50 |
| Federal public school             | 36  | 88.79 | 1.39 |
| Private school                    | 582 | 87.40 | 0.26 |
| NGO                               | 44  | 85.39 | 1.11 |
| Other                             | 115 | 86.86 | 0.68 |
| Multiple public schools           | 46  | 85.94 | 0.89 |
| Multiple private schools          | 29  | 88.42 | 1.21 |
| Multiple public + private schools | 86  | 88.12 | 0.75 |

**Table S4. Score for private vs. public institutions.** N: number of participants in each group; Mean: mean scores for each group; SEM: standard error of the mean.

| Type of institution | N   | Mean  | SEM  |
|---------------------|-----|-------|------|
| Public education    | 791 | 86.55 | 0.24 |
| Private education   | 611 | 87.45 | 0.25 |
| Both                | 232 | 86.93 | 0.47 |

**Table S5. Score by teaching level.** N: number of participants in each group; Mean: mean scores for each group; SEM: standard error of the mean.

| Teaching level                   | N   | Mean  | SEM  |
|----------------------------------|-----|-------|------|
| Pre-school/kindergarten          | 307 | 85.66 | 0.39 |
| First years of elementary school | 417 | 86.65 | 0.33 |
| Last years of elementary school  | 99  | 87.08 | 0.58 |
| High school                      | 67  | 87.15 | 0.98 |
| Technical school                 | 28  | 86.35 | 1.13 |
| College/university               | 133 | 88.72 | 0.53 |

|                                          |     |       |      |
|------------------------------------------|-----|-------|------|
| Multiple grades up to elementary         | 254 | 87.45 | 0.41 |
| Multiple grades up to high school        | 212 | 86.75 | 0.47 |
| Multiple grades up to technical school   | 14  | 87.24 | 1.28 |
| Multiple grades up to college/university | 103 | 88.59 | 0.66 |

**Table S6. Score by time in education.** Time in education: years; N: number of participants in each group; Mean: mean scores for each group; SEM: standard error of the mean.

| Time on education | N   | Mean  | SEM  |
|-------------------|-----|-------|------|
| Less than a year  | 71  | 85.26 | 0.92 |
| 1-3               | 129 | 85.52 | 0.68 |
| 4-6               | 178 | 86.69 | 0.51 |
| 7-10              | 244 | 86.70 | 0.43 |
| 11-20             | 473 | 86.95 | 0.30 |
| 21-30             | 357 | 87.56 | 0.34 |
| 31-40             | 148 | 87.78 | 0.52 |
| More than 40      | 34  | 88.55 | 0.96 |

**Table S7. Score by age groups.** Age: in years; N: number of participants in each group; Mean: mean scores for each group; SEM: standard error of the mean.

| Age   | N   | Mean  | SEM  |
|-------|-----|-------|------|
| 21-30 | 172 | 86.73 | 0.57 |
| 31-40 | 492 | 86.60 | 0.29 |
| 41-50 | 549 | 87.14 | 0.28 |
| 51-60 | 331 | 87.13 | 0.38 |
| 61-70 | 79  | 86.88 | 0.72 |
| 71+   | 11  | 90.26 | 1.67 |

**Table S8. Score by Gender.** N: number of participants in each group; Mean (SEM): mean scores for each group (standard error of the mean); ND: Not declared.

| Gender | N    | Mean  | SEM  |
|--------|------|-------|------|
| Female | 1454 | 86.92 | 0.17 |
| LGBTTT | 15   | 90.71 | 1.73 |
| Male   | 162  | 87.08 | 0.53 |

**Table S9. Score by institutional role.** N: number of participants in each group; Mean: mean scores for each group; SEM: standard error of the mean.

| Institutional role | N   | Mean  | SEM  |
|--------------------|-----|-------|------|
| Teacher            | 942 | 86.67 | 0.22 |
| Coordinator        | 165 | 87.14 | 0.57 |
| Principal          | 71  | 87.27 | 0.71 |
| Advisor            | 53  | 87.80 | 0.76 |
| Owner              | 2   | 91.07 | 5.36 |
| Intern             | 39  | 87.27 | 0.95 |
| Volunteer          | 34  | 88.44 | 1.09 |

|                                   |     |       |      |
|-----------------------------------|-----|-------|------|
| Others                            | 237 | 87.14 | 0.42 |
| Multiple roles (administrative)   | 34  | 86.66 | 0.90 |
| Multiple roles (teaching)         | 22  | 86.20 | 1.47 |
| Multiple roles (admin + teaching) | 35  | 88.67 | 1.18 |

**Table S10. Confidence levels according to age.** Age: in years; N: number of participants in each group; Mean: mean scores for each group; SEM: standard error of the mean.

| Age   | N   | Mean | SEM  |
|-------|-----|------|------|
| 21-30 | 172 | 4.2  | 0.04 |
| 31-40 | 492 | 4.39 | 0.02 |
| 41-50 | 549 | 4.41 | 0.02 |
| 51-60 | 331 | 4.48 | 0.03 |
| 61-70 | 79  | 4.36 | 0.06 |
| 71+   | 11  | 4.35 | 0.16 |

**Table S11. Confidence levels according to teaching level.** N: number of participants in each group; Mean: mean scores for each group; SEM: standard error of the mean.

| Teaching level                           | N   | Mean | SEM  |
|------------------------------------------|-----|------|------|
| Pre-school/kindergarten                  | 307 | 4.31 | 0.03 |
| First years of elementary school         | 417 | 4.44 | 0.03 |
| Last years of elementary school          | 99  | 4.33 | 0.05 |
| High school                              | 67  | 4.36 | 0.06 |
| Technical school                         | 28  | 4.23 | 0.10 |
| College/university                       | 133 | 4.41 | 0.04 |
| Multiple grades up to elementary         | 254 | 4.47 | 0.03 |
| Multiple grades up to high school        | 212 | 4.35 | 0.04 |
| Multiple grades up to technical school   | 14  | 4.47 | 0.14 |
| Multiple grades up to college/university | 103 | 4.43 | 0.05 |

**Table S12. Confidence levels according to time in education.** Time in education: years; N: number of participants in each group; Mean: mean scores for each group; SEM: standard error of the mean.

| Time on education | N   | Mean | SEM  |
|-------------------|-----|------|------|
| Less than a year  | 71  | 4.19 | 0.06 |
| 1-3               | 129 | 4.28 | 0.05 |
| 4-6               | 178 | 4.37 | 0.04 |
| 7-10              | 244 | 4.40 | 0.03 |
| 11-20             | 473 | 4.41 | 0.02 |
| 21-30             | 357 | 4.40 | 0.03 |
| 31-40             | 148 | 4.50 | 0.04 |
| More than 40      | 34  | 4.42 | 0.09 |

**Table S13. Score by individual questions.** Differences among participants was tested using a two-way ANOVA. Significant p-values per variable were reported. Variables Age, gender, Type of institution, Institutional roles and Time in education did not present significant differences. Cap.: Capital; Pub.: Public; Priv.: Private.

| Question                                                                                                                                                                              | Region   | Cap. vs outskirts | Pub. vs Priv. | Teaching levels | Category                          |
|---------------------------------------------------------------------------------------------------------------------------------------------------------------------------------------|----------|-------------------|---------------|-----------------|-----------------------------------|
| We only use 10% of our brain's capacity (1)                                                                                                                                           |          |                   | p<0.045       | p< 0.021        | Brain characteristics             |
| Learning maturation (cerebral maturity) depends exclusively on genetics (6)                                                                                                           |          |                   | p <0.003      | p<0.038         | Brain characteristics             |
| Self-control training in students is exclusively the responsibility of parents, not teachers (7)                                                                                      |          | p<0.049           |               |                 | Executive and cognitive functions |
| Teachers should employ teaching methods that stimulate the right side (creative) or the left side (rational) depending on the type of student (8)                                     |          |                   |               | p<0.013         | Learning strategies and methods   |
| Left-handed students are not as capable of learning to read as right-handed students (11)                                                                                             | p<0.001  |                   |               |                 | Literacy, reading and writing     |
| Neuroimaging techniques like magnetic resonance imaging (MRI) can reveal a student's intelligence and capacity to learn (16)                                                          | p<0. 008 |                   |               |                 | Learning strategies and methods   |
| Dyslexia is a brain condition that is not related to intelligence; thus, an individual can be dyslexic as well as intelligent (17)                                                    | p<0.020  |                   |               | p<0.0007        | Learning disorders                |
| Male brains have greater capacity for logical reasoning (science, mathematics), while females are more intuitive (language, arts) (20)                                                | p<0.014  | p<0.002           |               |                 | Brain characteristics             |
| The sleep cycle changes during adolescence; thus, pushing back the start time for morning classes could facilitate learning (21)                                                      | p<0.0003 | p<0.020           | p<0.024       | p<0.0004        | Neurophysiology and learning      |
| Seven years old is considered a critical age for written language acquisition; thus, someone who does not learn to write by this age will most likely never become a good reader (24) |          | p<0.0324          |               |                 | Literacy, reading and writing     |
| Learning to speak a second language during childhood (bilingualism) can compromise development (25)                                                                                   |          |                   |               | p<0.0187        | Literacy, reading and writing     |
| Neuroplasticity (the brain's capacity to change, adapt and learn new things) ends after adolescence (27)                                                                              | p<0.005  |                   |               |                 | Brain characteristics             |
